# Supplementary material for: Prevalence and Factors of Anxiety During the Coronavirus-2019 Pandemic Among Teachers in Saudi Arabia
Source: Frontiers journal article supplement (doi:10.3389/fpubh.2022.827238), 2022-03-21
Supplement: Data_Sheet_3.pdf [file Data_Sheet_3.pdf]

# Cronbach's alphas

1. The behavioural and commitment of teachers to the health policy restricted regulations towards COVID-19( Cronbach's alphas with their 95% confidence interval and Inter-Item Correlation Matrix for the behavioural status section)

| Item                               | Item Statistics                     |                                              |             | Inter-Item Correlation Matrix |              |                              |                             |
|------------------------------------|-------------------------------------|----------------------------------------------|-------------|-------------------------------|--------------|------------------------------|-----------------------------|
|                                    | Mean                                | Std. Deviation                               | N           | wearing a mask                | Hand Washing | not attending family meeting | Not to be in crowded places |
| wearing a mask                     | 2.56                                | .644                                         | 741         | 1.00                          | .317         | .149                         | .129                        |
| Hand Washing                       | 2.42                                | .709                                         | 741         | .317                          | 1.00         | .314                         | .254                        |
| not attending family meeting       | 2.21                                | .761                                         | 741         | .149                          | .314         | 1.00                         | .591                        |
| Not to be in crowded places        | 2.38                                | .73                                          | 741         | .129                          | .254         | .591                         | 1.00                        |
|                                    | Mean                                | 2.39                                         |             |                               |              |                              |                             |
|                                    | Varian ce                           | .021                                         |             |                               |              |                              |                             |
| Intraclass Correlation Coefficient |                                     |                                              |             |                               |              |                              |                             |
|                                    | Intraclass Correlation <sup>b</sup> | 95% Confidence Interval                      |             | F Test with True Value 0      |              |                              |                             |
|                                    |                                     | Lower Bound                                  | Upper Bound | Value                         | df1          | df2                          | Sig                         |
| Single Measures                    | .298 <sup>a</sup>                   | .260                                         | .338        | 2.701                         | 740          | 2220                         | .000                        |
| Average Measures                   | .630 <sup>c</sup>                   | .584                                         | .671        | 2.701                         | 740          | 2220                         | .000                        |
|                                    |                                     |                                              |             |                               |              |                              |                             |
| Reliability Statistics             |                                     |                                              |             |                               |              |                              |                             |
|                                    | Cronbach's Alpha                    | Cronbach's Alpha Based on Standardized Items |             |                               | N of Items   |                              |                             |
|                                    | .630                                | .623                                         |             |                               | 4            |                              |                             |

**2. Generalized Anxiety Disorder (GAD)** ( Cronbach's alphas with their 95% confidence interval and Inter-Item Correlation Matrix for the GAD section)

| Item                                                   | Item Statistics                     |                                              | Inter-Item Correlation Matrix |                          |       |       |       |       |       |
|--------------------------------------------------------|-------------------------------------|----------------------------------------------|-------------------------------|--------------------------|-------|-------|-------|-------|-------|
|                                                        | Mean                                | Std. Deviation                               | Q1                            | Q2                       | Q3    | Q4    | Q5    | Q6    | Q7    |
| Q1. Feeling nervous, anxious or on edge?               | 1.04                                | .861                                         | 1.000                         | .678                     | .608  | .550  | .488  | .589  | .527  |
| Q2. Not being able to stop or control worrying?        | .84                                 | .868                                         | .678                          | 1.000                    | .683  | .605  | .512  | .564  | .578  |
| Q3.Worrying too much about different things?           | 1.08                                | .913                                         | .608                          | .683                     | 1.000 | .639  | .514  | .594  | .580  |
| Q4. Trouble relaxing?                                  | .98                                 | .917                                         | .550                          | .605                     | .639  | 1.000 | .567  | .581  | .545  |
| Q5. Being so restless that it is hard to sit still?    | .64                                 | .868                                         | .488                          | .512                     | .514  | .567  | 1.000 | .552  | .626  |
| Q6. Becoming easily annoyed or irritable?              | 1.00                                | .948                                         | .589                          | .564                     | .594  | .581  | .552  | 1.000 | .565  |
| Q7. Feeling afraid as if something awful might happen? | .74                                 | .918                                         | .527                          | .578                     | .580  | .545  | .626  | .565  | 1.000 |
|                                                        | Mean<br>2.39                        |                                              |                               |                          |       |       |       |       |       |
|                                                        | Variance<br>.021                    |                                              |                               |                          |       |       |       |       |       |
| Intraclass Correlation Coefficient                     |                                     |                                              |                               |                          |       |       |       |       |       |
|                                                        | Intraclass Correlation <sub>b</sub> | 95% Confidence Interval                      |                               | F Test with True Value 0 |       |       |       |       |       |
|                                                        |                                     | Lower Bound                                  | Upper Bound                   | Value                    | df1   | df2   | Sig   |       |       |
| Single Measures                                        | .578 <sup>a</sup>                   | .548                                         | .607                          | 10.576                   | 740   | 4440  | .000  |       |       |
| Average Measures                                       | .905 <sup>c</sup>                   | .895                                         | .915                          | 10.576                   | 740   | 4440  | .000  |       |       |
|                                                        |                                     |                                              |                               |                          |       |       |       |       |       |
| Reliability Statistics                                 |                                     |                                              |                               |                          |       |       |       |       |       |
|                                                        | Cronbach's Alpha                    | Cronbach's Alpha Based on Standardized Items |                               | N of Items               |       |       |       |       |       |
|                                                        | .905                                | .906                                         |                               | 7                        |       |       |       |       |       |

3. **GAD score and the behavioural and commitment of teachers to the health policy restricted regulations towards COVID-19 only** ( Cronbach's alphas with their 95% confidence interval and Inter-Item Correlation Matrix for the GAD section and Behaviour status)

| Item                               | Inter-Item Correlation Matrix       |                                              |                               |                             |            |       |       |       |       |       |       |
|------------------------------------|-------------------------------------|----------------------------------------------|-------------------------------|-----------------------------|------------|-------|-------|-------|-------|-------|-------|
|                                    | wearing a mask                      | Hand Washi ng                                | not attendin g family meeting | Not to be in crowded places | Q1         | Q2    | Q3    | Q4    | Q5    | Q6    | Q7    |
| wearing a mask                     | 1.000                               | .317                                         | .149                          | .129                        | -.001      | .000  | .017  | -.006 | -.042 | .003  | -.043 |
| Hand Washing                       | .317                                | 1.000                                        | .314                          | .254                        | .089       | .041  | .022  | .044  | .000  | .053  | .014  |
| not attending family meeting       | .149                                | .314                                         | 1.000                         | .591                        | .016       | .076  | .064  | .053  | .026  | .040  | .039  |
| Not to be in crowded places        | .129                                | .254                                         | .591                          | 1.000                       | .030       | .044  | .050  | .053  | -.007 | .019  | .005  |
| Q1.                                | -.001                               | .089                                         | .016                          | .030                        | 1.000      | .678  | .608  | .550  | .488  | .589  | .527  |
| Q2.                                | .000                                | .041                                         | .076                          | .044                        | .678       | 1.000 | .683  | .605  | .512  | .564  | .578  |
| Q3                                 | .017                                | .022                                         | .064                          | .050                        | .608       | .683  | 1.000 | .639  | .514  | .594  | .580  |
| Q4.                                | -.006                               | .044                                         | .053                          | .053                        | .550       | .605  | .639  | 1.000 | .567  | .581  | .545  |
| Q5.                                | -.042                               | .000                                         | .026                          | -.007                       | .488       | .512  | .514  | .567  | 1.000 | .552  | .626  |
| Q6.                                | .003                                | -.053                                        | .040                          | .019                        | .589       | .564  | .594  | .581  | .552  | 1.000 | .565  |
| Q7.                                | -.043                               | .014                                         | .039                          | .005                        | .527       | .578  | .580  | .545  | .626  | .565  | 1.000 |
|                                    | Mean 2.39                           |                                              |                               |                             |            |       |       |       |       |       |       |
|                                    | Variance .021                       |                                              |                               |                             |            |       |       |       |       |       |       |
| Intraclass Correlation Coefficient |                                     |                                              |                               |                             |            |       |       |       |       |       |       |
|                                    | Intraclass Correlation <sup>b</sup> | 95% Confidence Interval                      |                               | F Test with True Value 0    |            |       |       |       |       |       |       |
|                                    |                                     | Lower Bound                                  | Upper Bound                   | Value                       |            | df1   | df2   | Sig   |       |       |       |
| Single Measures                    | .289 <sup>a</sup>                   | .263                                         | .317                          | 5.468                       | 740        | 7400  | .000  |       |       |       |       |
| Average Measures                   | .817 <sup>c</sup>                   | .797                                         | .836                          | 5.468                       | 740        | 7400  | .000  |       |       |       |       |
|                                    |                                     |                                              |                               |                             |            |       |       |       |       |       |       |
| Reliability Statistics             |                                     |                                              |                               |                             |            |       |       |       |       |       |       |
|                                    | Cronbach's Alpha                    | Cronbach's Alpha Based on Standardized Items |                               |                             | N of Items |       |       |       |       |       |       |
|                                    | .817                                | .797                                         |                               |                             | 11         |       |       |       |       |       |       |

Two-way mixed effects model where people effects are random and measures effects are fixed.

- The estimator is the same, whether the interaction effect is present or not.
- Type C intraclass correlation coefficients using a consistency definition-the between-measure variance is excluded from the denominator variance.
- This estimate is computed assuming the interaction effect is absent, because it is not estimable otherwise.
